# Supplementary material for: Heterogeneity in Aripiprazole Diffusion for Bipolar Disorder Treatment in the Veterans Health Administration
Source: Atypon-hosted journal article supplement (doi:10.1176/appi.ps.201200061), 2012-12-01
Supplement: 1178_ds001.pdf [file 1178_ds001.pdf]

|                                                                                                                           |   |      |       |        |      |
|---------------------------------------------------------------------------------------------------------------------------|---|------|-------|--------|------|
| Midwestern                                                                                                                | 1 | 0.52 | 0.07  | 4.00   | 0.53 |
| Percent "highly rural" patients                                                                                           | 1 | 0.34 | <.01  | 132.75 | 0.72 |
| <b>Composition of the Patient Population</b>                                                                              |   |      |       |        |      |
| Population Composition of VISN                                                                                            |   |      |       |        |      |
| Percent of all veterans in VISN diagnosed with a serious mental illness                                                   | 1 | 0.02 | <.01  | >999   | 0.92 |
| Population Composition of Patients with Bipolar Disorder Data Supplement for Dusetzina et al. (10.1176/appi.ps.201200002) |   |      |       |        |      |
| Percent white                                                                                                             | 1 | 0.91 | 0.79  | 1.05   | 0.19 |
| Percent hispanic                                                                                                          | 1 | 1.14 | 0.81  | 1.59   | 0.45 |
| Percent residing in rural areas                                                                                           | 1 | 0.10 | <.01  | 57.42  | 0.48 |
| Percent homeless                                                                                                          | 1 | 0.96 | 0.79  | 1.12   | 0.69 |
| Medical center patients                                                                                                   |   |      |       |        |      |
| Total unique                                                                                                              | 1 | 1.00 | 1.00  | 1.00   | 0.80 |
| SMI patients (bipolar + shizophrenia + schizoaffective)                                                                   | 1 | 1.00 | 1.00  | 1.00   | 0.49 |
| Number of psychiatrists/unique SMI patients                                                                               | 1 | <.01 | <.01  | >999   | 0.90 |
| Population Complexity of Patients with Bipolar Disorder                                                                   |   |      |       |        |      |
| Percent with comorbid diabetes                                                                                            | 1 | 0.72 | 0.41  | 1.26   | 0.25 |
| Percent with comorbid substance abuse                                                                                     | 1 | 1.04 | 0.84  | 1.27   | 0.74 |
| Percent with Veterans Equitable Resource Allocation Score - patients who meet the definition for complex care             | 1 | 1.20 | 0.29  | 4.89   | 0.80 |
| Percent with Veterans Equitable Resource Allocation Score for complex, chronic mental health needs                        | 1 | 1.05 | 0.76  | 1.46   | 0.76 |
| Utilization Rates for patients with bipolar disorder:                                                                     |   |      |       |        |      |
| Inpatient                                                                                                                 |   |      |       |        |      |
| Mean length of stay for all inpatient stays                                                                               | 1 | 0.80 | 0.61  | 1.04   | 0.10 |
| Mean length of stay for all psychiatric hospitalizations                                                                  | 1 | 0.87 | 0.73  | 1.02   | 0.09 |
| Percent with inpatient stays >100-days                                                                                    | 1 | 1.53 | 0.48  | 4.92   | 0.48 |
| Percent with residential rehabilitation use                                                                               | 1 | 0.89 | 0.59  | 1.33   | 0.57 |
| Percent with inpatient stays <7-days                                                                                      | 1 | 0.92 | 0.76  | 1.10   | 0.35 |
| Total cumulative days of stay at other stations                                                                           | 1 | 0.70 | 0.19  | 2.61   | 0.60 |
| Outpatient                                                                                                                |   |      |       |        |      |
| Mean number of Psychiatric clinic stops                                                                                   | 1 | 1.65 | 0.90  | 3.01   | 0.10 |
| Mean number of general clinic stops                                                                                       | 1 | 1.37 | 0.87  | 2.15   | 0.17 |
| Mean number of substance abuse stops                                                                                      | 1 | 0.97 | 0.662 | 1.42   | 0.87 |
| Mean number of case management stops for patients with bipolar disorder                                                   | 1 | 1.13 | 0.25  | 4.89   | 0.89 |
| Medication                                                                                                                |   |      |       |        |      |
| Patients with bipolar disorder using aripiprazole / all veterans in VISN                                                  | 1 | 0.89 | 0.49  | 1.63   | 0.71 |
| Percentage of patients with bipolar disorder using olanzapine                                                             | 1 | 0.96 | 0.79  | 1.17   | 0.69 |
| Percent of patients with bipolar disorder using multiple antipsychotics concurrently                                      | 1 | 0.99 | 0.57  | 1.72   | 0.96 |
| <b>Supply and Composition of Mental Health Clinicians</b>                                                                 |   |      |       |        |      |
| Total psychiatrist FTEE                                                                                                   | 1 | 0.99 | 0.97  | 1.02   | 0.64 |
| Total non-physician mental health prescriber FTEE                                                                         | 1 | 0.99 | 0.89  | 1.11   | 0.89 |
| Ratio of MD to non-MD (with prescribing privileges) in mental health                                                      | 1 | 0.54 | <.01  | >999   | 0.94 |
| Staff turnover: Percent on service for > 2 years                                                                          | 1 | 1.02 | 0.93  | 1.11   | 0.67 |
| Number part-time psychiatrists / Number of full-time psychiatrists                                                        | 1 | 1.30 | 0.91  | 1.86   | 0.14 |
| Medical center staff                                                                                                      |   |      |       |        |      |
| Total Clinical staff                                                                                                      | 1 | 1.00 | 1.00  | 1.00   | 0.86 |
| Psychiatry staff per general population veteran                                                                           | 1 | <.01 | <.01  | >999   | 0.74 |
| Psychiatry staff per any other physician type                                                                             | 1 | <.01 | <.01  | >999   | 0.32 |
| <b>Mental Health Policies and Directives</b>                                                                              |   |      |       |        |      |
| Existence of VISN-wide MH policies or directives (yes/no)                                                                 | 1 | 0.56 | 0.10  | 3.15   | 0.51 |
| Existence of a Mental Health Service Line (yes/no)                                                                        | 1 | 0.38 | 0.06  | 2.31   | 0.29 |
| Number of VAMCs reporting moderate to great deal of control over medication policies                                      | 1 | 0.12 | <.01  | 16.28  | 0.40 |
| MH Service line sets VISN-wide clinical policies and practice guidelines (yes/no)                                         | 1 | 0.56 | 0.09  | 3.52   | 0.54 |
| MH Service line has full authority over local budgets for clinical areas (yes/no)                                         | 1 | 0.23 | 0.02  | 2.73   | 0.25 |
| MH Service line has matrixed input into local budgets for clinical areas (yes/no)                                         | 1 | 0.89 | 0.10  | 7.86   | 0.92 |
| MH Service line has full authority over facility staff (yes/no)                                                           | 1 | 0.33 | 0.05  | 2.43   | 0.28 |
| MH Service line has matrixed input into facility staff (yes/no)                                                           | 1 | <.01 | <.01  | >999   | 0.96 |
| VISN service line strength: Percent of VISN's service lines reporting "direct supervisory authority over facility staff"  | 1 | 0.61 | 0.21  | 1.74   | 0.36 |
| Academic affiliation: Percent of hospitals in VISN with counsel of teaching hospitals affiliation                         | 1 | 0.23 | 0.01  | 40.48  | 0.58 |
